# Supplementary material for: Noninvasive Detection of Response and Resistance in EGFR -Mutant Lung Cancer Using Quantitative Next-Generation Genotyping of Cell-Free Plasma DNA
Source: Oxford University Press journal article supplement (doi:10.1158/1078-0432.ccr-13-2482), 2014-01-15
Supplement: 10780432ccr132482-sup-data.xlsx [file 10780432ccr132482-sup-data.xlsx]

## Sheet: Figure 2
Figure 2 ddPCR results, expressed both in copies per mL of plasma and as percent mutant versus wildtype
Testing Cohort	Sample	Tumor Genotype	ddPCR assay	Concentration (copies / mL plasma)	% mut / wt
EGFR L858R	1	EGFR L858R	EGFR L858R	819	26.4
	2	KRAS mutant	EGFR L858R	0	0
	3	EGFR L858R	EGFR L858R	50	0.1
	4	KRAS mutant	EGFR L858R	0	0
	5	EGFR L858R	EGFR L858R	4.25	0.5
	6	KRAS mutant	EGFR L858R	0	0
	7	KRAS mutant	EGFR L858R	0	0
	8	KRAS mutant	EGFR L858R	0	0
	9	KRAS mutant	EGFR L858R	0.85	0.9
	10	EGFR L858R	EGFR L858R	15	1.5
	11	EGFR L858R	EGFR L858R	678	34.1
	12	EGFR L858R	EGFR L858R	1.025	0.74
	13	KRAS mutant	EGFR L858R	0	0
	13	KRAS mutant	EGFR L858R	0.7	0.2
	14	KRAS mutant	EGFR L858R	0	0
	15	KRAS mutant	EGFR L858R	0	0
	16	KRAS mutant	EGFR L858R	0	0
	17	EGFR L858R	EGFR L858R	1000	31.7
	18	EGFR L858R	EGFR L858R	15.5	0.8
	19	EGFR L858R	EGFR L858R	0	0
	20	EGFR L858R	EGFR L858R	1	0.4
	21	EGFR L858R	EGFR L858R	6.95	1.8
EGFR Del19	1	EGFR deletion 19	EGFR deletion 19	2192.5	3.8
	2	EGFR deletion 19	EGFR deletion 19	0	0
	3	KRAS mutant	EGFR deletion 19	4.95	0.7
	4	KRAS mutant	EGFR deletion 19	2.7	0.06
	5	KRAS mutant	EGFR deletion 19	0	0
	6	EGFR deletion 19	EGFR deletion 19	0	0
	7	EGFR deletion 19	EGFR deletion 19	28.1	4.7
	8	KRAS mutant	EGFR deletion 19	0	0
	9	EGFR deletion 19	EGFR deletion 19	0	0
	10	EGFR deletion 19	EGFR deletion 19	164	6.1
	11	EGFR deletion 19	EGFR deletion 19	12.05	12.1
	12	KRAS mutant	EGFR deletion 19	0	0
	13	KRAS mutant	EGFR deletion 19	4.65	0.9
	14	EGFR deletion 19	EGFR deletion 19	13.8	13.1
	15	KRAS mutant	EGFR deletion 19	0	0
	16	KRAS mutant	EGFR deletion 19	0	0
	17	KRAS mutant	EGFR deletion 19	0	0
	18	KRAS mutant	EGFR deletion 19	0	0
	19	KRAS mutant	EGFR deletion 19	0	0
	20	KRAS mutant	EGFR deletion 19	0	0
	21	KRAS mutant	EGFR deletion 19	0	0
	22	EGFR deletion 19	EGFR deletion 19	8.9	18.1
KRAS G12C	1	EGFR mutant	KRAS G12C	0	0
	2	EGFR mutant	KRAS G12C	0	0
	3	EGFR mutant	KRAS G12C	0	0
	4	EGFR mutant	KRAS G12C	0	0
	5	KRAS G12C	KRAS G12C	0	0
	6	KRAS G12C	KRAS G12C	13.3	4.2
	7	EGFR mutant	KRAS G12C	0	0
	8	EGFR mutant	KRAS G12C	0	0
	9	EGFR mutant	KRAS G12C	0	0
	10	KRAS G12C	KRAS G12C	1.75	0.3
	11	KRAS G12C	KRAS G12C	41.5	3.3
	12	EGFR mutant	KRAS G12C	0	0
	13	EGFR mutant	KRAS G12C	0	0
	14	KRAS G12C	KRAS G12C	0	0
	15	EGFR mutant	KRAS G12C	0	0
	16	KRAS G12C	KRAS G12C	36.5	11.6
	17	EGFR mutant	KRAS G12C	0	0
	18	EGFR mutant	KRAS G12C	0	0
	19	KRAS G12C	KRAS G12C	0	0
	20	KRAS G12C	KRAS G12C	10	4.8
	21	EGFR mutant	KRAS G12C	0	0
	22	EGFR mutant	KRAS G12C	0	0
	23	EGFR mutant	KRAS G12C	0	0
	24	EGFR mutant	KRAS G12C	0	0
	25	KRAS G12C	KRAS G12C	157.5	14
	26	EGFR mutant	KRAS G12C	0	0
	27	KRAS G12C	KRAS G12C	2.5	0.5
	28	KRAS G12C	KRAS G12C	39	2.2
	29	KRAS G12C	KRAS G12C	10.85	6.9
	30	KRAS G12C	KRAS G12C	0	0
	31	KRAS G12C	KRAS G12C	149.5	12.3

## Sheet: Figure 4
Figure 4 ddPCR results, expressed both in copies per mL of plasma and as percent mutant versus wildtype
Patient	Genotype	Days	Concentration (copies / mL plasma)	% mut / wt
A	EGFR T790M	0	1.005	0.2
		60	0	0
		90	0	0
		150	39.15	6.6
		210	187	17.3
		240	20.05	2.2
		255	7.6	1.4
	EGFR L858R	0	3.475	0.33
		60	1.415	1.3
		90	0.815	0.8
		150	127.45	7.2
		210	436	20.6
		240	65.95	4.3
		255	28.5	2.2
B	EGFR L858R	0	2490	64.4
		14	291.25	18.6
		65	8.9	1
		95	10.15	0.9
C	KRAS G12C	0	57.15	1.52
		21	15.2	1.14
		42	17.1	1.06
D	BRAF V600E	0	42.6	11.3
		40	63.85	18.2
		70	107.9	43.7
		120	20.65	0.5
		150	1	0.5

## Sheet: Figure 5
Figure 5 ddPCR results, expressed both in copies per mL of plasma and as percent mutant versus wildtype
Patient	Genotype	Weeks on Treatment	Concentration (copies / mL plasma)	% mut / wt
A	EGFR T790M	0	0	0
		16	0	0
		24	44.35	3
		32	51	8.6
	EGFR Del19	0	627.1	18.9
		16	3.57	1.9
		24	137	8.6
		32	199.25	21.6
B	EGFR T790M	0	0	0
		8	0	0
		16	0	0
		24	2.15	4.6
		32	11.25	6.4
		40	29.8	11.1
	EGFR Del19	0	78.55	31
		8	0	0
		16	1.2	2.6
		24	22.5	6.5
		32	40.1	14.6
		40	129.1	32.7
C	EGFR T790M	0	0	0
		8	0	0
		16	0	0
		24	0	0
		32	0	0
		40	30.75	8.2
		48	86.9	13.2
		53	100.7	13.1
	EGFR Del19	0	18.6	9
		8	0	0
		16	0	0
		24	0	0
		32	0	0
		40	274.25	35.1
		48	325.7	75.3
		53	208.55	71.3
D	EGFR T790M	0	0	0
		8	0	0
		16	0	0
		24	0	0
		32	0	0
		40	0	0
		48	0	0
		52	14.285	8
		61	1.425	1.2
		69	2.855	1.6
	EGFR Del19	0	8.55	4
		8	13.55	4.3
		16	0	0
		24	0	0
		32	0	0
		40	0	0
		48	0	0
		52	76	34.9
		61	0	0
		69	0	0
E	EGFR T790M	0	0	0
		8	0	0
		16	0	0
		24	1.6	1.4
	EGFR Del19	0	110.5	40.6
		8	0	0
		16	2.85	9.5
		24	4.25	1.9
F	EGFR T790M	0	0	0
		8	0	0
		16	0	0
		24	0	0
		30	0	0
		36	0	0
		41	0	0
		42	0	0
		48	21.95	11.4
		52	51.25	17.2
	EGFR Del19	0	662.5	78.8
		8	0	0
		16	0	0
		24	0	0
		30	0	0
		36	0	0
		41	0	0
		42	0	0
		48	57.5	19.5
		52	70.5	36.4
G	EGFR Del19	0	18.5	5
		8	0	0
		24	0	0
H	EGFR Del19	0	0.71	0.5
		8	0	0
		16	0	0
		24	0	0
		32	0	0
		40	0	0
		48	0	0
		56	0	0
		64	0	0
I	EGFR L858R	0	36.25	23.2
		8	0	0
		16	0	0
		24	0	0
		32	0	0
